# Supplementary material for: Exploring MiR-484 Regulation by Polyalthia longifolia: A Promising Biomarker and Therapeutic Target in Cervical Cancer through Integrated Bioinformatics and an In Vitro Analysis
Source: MDPI journal article supplement (doi:10.3390/biomedicines12040909), 2024-04-19

**Supplementary Figure S1.** Relationships between miR-484 expression and clinicopathological parameters in 283 CC tissues. (A) Age $\leq$ 50 and age >50. (B) Grade: G1- G2 and G3-G4. (C) Stage I/I/III/ IV. (D) With and without radiation. (E-G) TNM stage.

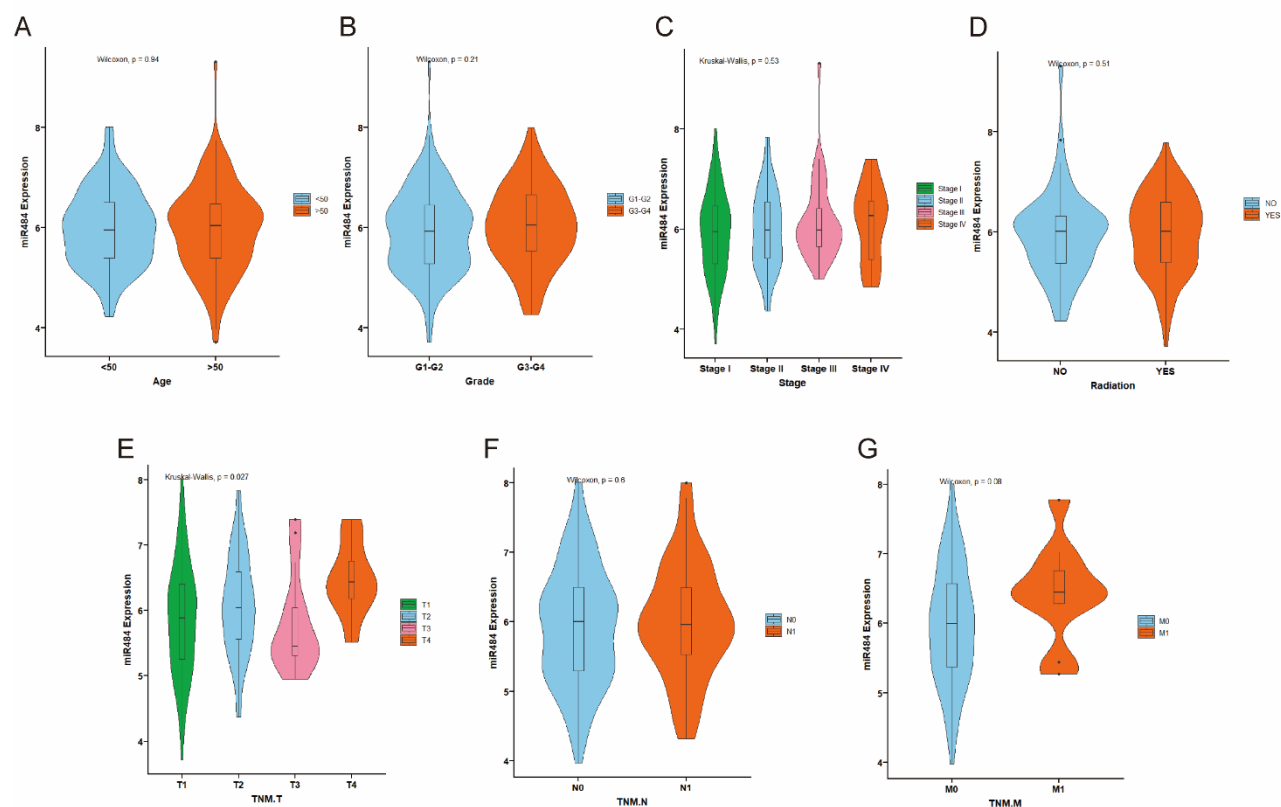

**Supplementary Figure S2.** The protein-protein interaction (PPI) network presents NFs and miRNAs interacting with miR-484-related prognostic genes screened by Kaplan-Meier analysis. (A) The interaction network of prognostic genes with miRNAs. (B) The interaction network of prognostic genes with NFs.

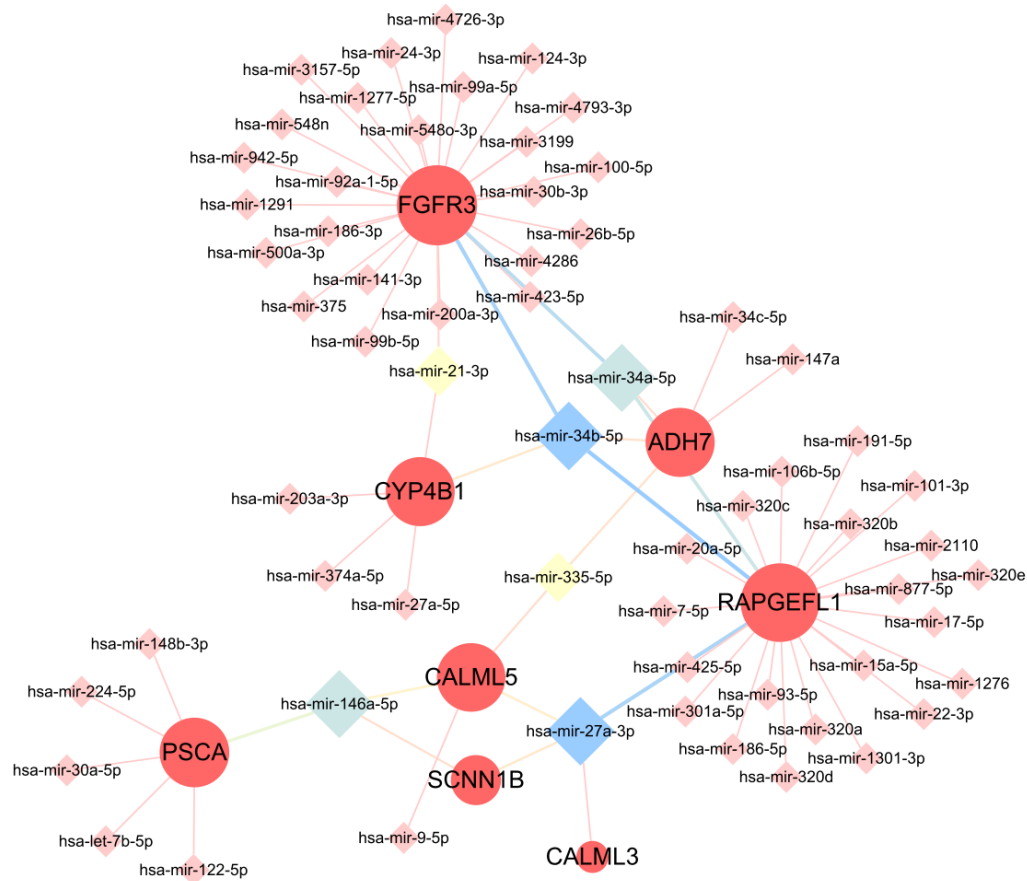

(B)

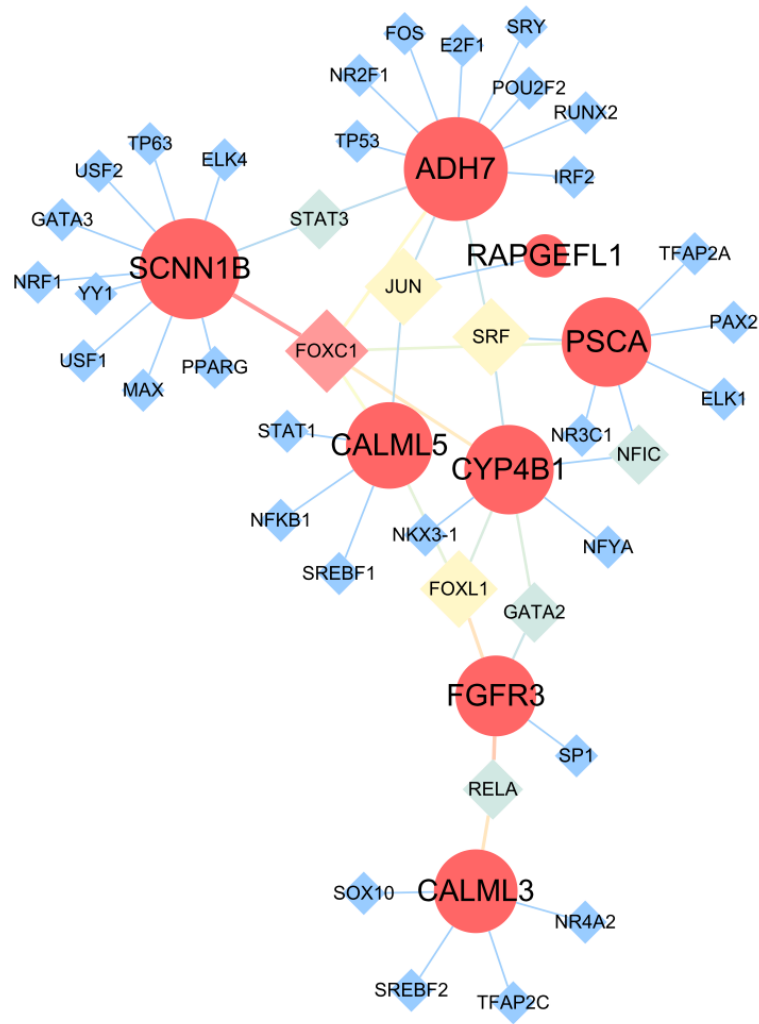

Supplement: s1 [file s1]
